## RESEARCH ARTICLE

# Generation of a white-albino phenotype from cobalt blue and yellow-albino rainbow trout (*Oncorhynchus mykiss*): Inheritance pattern and chromatophores analysis

Ricardo Shohei Hattori<sup>1\*</sup>, Tullio Teruo Yoshinaga<sup>2</sup>, Arno Juliano Butzge<sup>3</sup>, Shoko Hattori-Ihara<sup>4</sup>, Ricardo Yasuichi Tsukamoto<sup>5</sup>, Neuza Sumico Takahashi<sup>6</sup>, Yara Aiko Tabata<sup>1</sup>

**1** Salmonid Experimental Station at Campos do Jordão, Unidade de Pesquisa e Desenvolvimento-Campos do Jordão, Agência Paulista de Tecnologia dos Agronegócios, Secretaria de Agricultura, São Paulo, Brazil, **2** Department of Surgery, School of Veterinary Medicine and Animal Sciences, University of Sao Paulo, Sao Paulo, Brazil, **3** Graduate Program in Biological Sciences (Genetics), Institute of Biosciences of Botucatu - São Paulo State University, Botucatu, São Paulo, Brazil, **4** Department of Marine Biosciences, Tokyo University of Marine Science and Technology, Tokyo, Japan, **5** Puriaqua Limitada, Sao Paulo, Brazil, **6** Sao Paulo Fisheries Institute, Agência Paulista de Tecnologia dos Agronegócios, Secretaria de Agricultura, Sao Paulo, Brazil

\* [hattori.fish@gmail.com](mailto:hattori.fish@gmail.com)

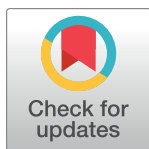

## OPEN ACCESS

**Citation:** Hattori RS, Yoshinaga TT, Butzge AJ, Hattori-Ihara S, Tsukamoto RY, Takahashi NS, et al. (2020) Generation of a white-albino phenotype from cobalt blue and yellow-albino rainbow trout (*Oncorhynchus mykiss*): Inheritance pattern and chromatophores analysis. PLoS ONE 15(1): e0214034. <https://doi.org/10.1371/journal.pone.0214034>

**Editor:** Tzong-Yueh Chen, National Cheng Kung University, TAIWAN

**Received:** February 28, 2019

**Accepted:** December 7, 2019

**Published:** January 27, 2020

**Copyright:** © 2020 Hattori et al. This is an open access article distributed under the terms of the [Creative Commons Attribution License](https://creativecommons.org/licenses/by/4.0/), which permits unrestricted use, distribution, and reproduction in any medium, provided the original author and source are credited.

**Data Availability Statement:** All relevant data are within the manuscript and its Supporting Information files.

**Funding:** This work was supported by FAPESP to RSH (2013/17612-9 and 2014/00569-6). The funder provided support in the form of fellowship for author [RSH], but did not have any additional role in study design, data collection and analysis, decision to publish, or preparation of the

## Abstract

Albinism is the most common color variation described in fish and is characterized by a white or yellow phenotype according to the species. In rainbow trout *Oncorhynchus mykiss*, aside from yellow-albino phenotypes, cobalt blue variants with autosomal, recessive inheritance have also been reported. In this study, we investigated the inheritance pattern and chromatophores distribution/abundance of cobalt blue trouts obtained from a local fish farm. Based on crosses with wild-type and dominant yellow-albino lines, we could infer that cobalt blue are dominant over wild-type and co-dominant in relation to yellow-albino phenotype, resulting in a fourth phenotype: the white-albino. Analysis of chromatophores revealed that cobalt blue trouts present melanophores, as the wild-type, and a reduced number of xanthophores. As regards to the white-albino phenotype, they were not only devoid of melanophores but also presented a reduced number of xanthophores. Cobalt blue and white-albino trouts also presented reduced body weight and a smaller pituitary gland compared to wild-type and yellow-albino phenotypes. The transcription levels of *tshb* and *trh* were up regulated in cobalt blue compared to wild type, suggesting the involvement of thyroid hormone in the expression of blue color. These phenotypes represent useful models for research on body pigmentation in salmonids and on the mechanisms behind endocrine control of color patterning.

## Introduction

The integumental pigmentary system of fish shares several conserved features with other vertebrate classes [1]. One of them is the presence of specific pigment-containing and light-

manuscript. The specific roles of these authors are articulated in the 'author contributions' section. Commercial affiliation of RYT did not play a role in the study.

**Competing interests:** The authors declare no conflict of interest. The following author is affiliated with Puriaqua Limitada, Brazil: RYT. The commercial affiliation with Puriaqua Limitada, Brazil does not alter our adherence to PLOS ONE policies on sharing data and materials.

reflecting cells involved mainly in body and eye pigmentation, known as chromatophores [2]. In the wild, body pigmentation is important for a variety of purposes such as protection against predators, advertising, sexual selection or warning [3]. In aquaculture industry, body pigmentation can be an economically relevant trait once external appearance can determine the commercial value of a given species, resembling the case of red Nile tilapia against wild-type [4] or the majority of freshwater/marine ornamental species [5]. In ecological studies, certain mutations in body coloration such as albinism can be very useful as visual markers for experimental tagging studies [6]. In genetic studies, they allow the evaluation of chromosome manipulation efficiency in gynogenetic or triploid animals [7,8] and also for optimization of gene editing approaches [9,10].

In rainbow trout, different color variations have been described such as the albino, palomino, and cobalt/metallic blue phenotypes [11,12]. Regarding albinism, genes such as *tyr-1*, *tyr-2*, and *slc45a2* were shown to be implicated in pigmentation [9,10]. However, the mechanism or cells behind the blue phenotype is still unresolved. In majority of fish species, the blue color is caused by a light scattering phenomenon in purine and pteridine platelets in the iridophores. When combined with xanthophores, other colors (e.g. green) can be generated, whereas in their absence the blue color becomes prominent [5]. Indeed, a previous study reported a reduced number of xanthophores in blue trouts [13], suggesting that blue phenotype might be related to iridophores and the density of xanthophores in the skin.

The inheritance of albino phenotypes is determined mainly by recessive genes [11], but there is also a case of a dominant strain [14]. In case of blue phenotype, Blanc and collaborators [15] described a blue strain with autosomal, recessive inheritance. Although economically attractive, the recessive inheritance in such phenotypes may result in detrimental pleiotropic effects with regard to fertility and growth [15,16], once they require the presence of both alleles to be expressed. Such conditions, also promotes the expression of deleterious traits by means of recessive mutations. For instance, fries/juveniles of yellow-albino variants are reported as inferior in terms of survival and growth [11,16]. In case of cobalt blue, it was observed an association between this phenotype with obesity [17] and disorders in liver and kidney [18–20]. There are also reports showing complete sterility in both sexes due to the lack of a large part of the pituitary gland [19,21].

Under this scenario, this study aimed to better characterize our cobalt blue trouts by performing crosses with wild-type and dominant yellow-albino strains of rainbow trout. We first investigated the inheritance of body color in these and in another phenotype, named as white-albino. Then, we also compared the density of chromatophores, body growth, and pituitary morphology of these four phenotypes.

## Materials and methods

### Ethics statement

This study was conducted in accordance with animal rights of Colégio Brasileiro de Experimentação Animal (COBEA) and approved by Comitê de Ética em Experimentação Animal do Instituto de Pesca de São Paulo, Brazil (04/2017).

### Source of animals

A total of 137 rainbow trout juveniles with total body weight of about 100 g and cobalt blue phenotype were obtained from a local trout farm at Sapucaí-Mirim (Minas Gerais State, Brazil). According to the farmers, these cobalt blue rainbow trout juveniles were produced by crosses between cobalt blue and wild-type phenotypes. They were transferred to Salmonid Experimental Station at Campos do Jordão (SES-CJ) and reared for more 12 months until

reaching sexual maturity for being used as broodstock in crosses experiments. Broodstock fish of wild-type and dominant yellow-albino strains from SES-CJ were used in crosses with cobalt blue females and males.

### Examination of color inheritance in crosses between different color phenotypes

To verify the inheritance of these phenotypes in relation to others, both females and males of cobalt blue rainbow trout were crossed between themselves and with the following strains: wild-type and dominant yellow-albino. According to a previous study on cobalt blue rainbow trout [15] and also based on our crosses, the cobalt blue and the yellow-albino phenotypes are determined by different gene *loci*. For those reasons, we have ascribed the letter B for the allele responsible for blue color due to its dominance over wild-type (see Results), and A for dominant yellow-albino. Thereby, the blue trout is scored as B+aa (BBaa/Bbaa), yellow albino as bbA+ (bbAA/bbAa), wild-type as bbaa, and white-albino as B+A+ (BBAA/BBAa/BbAA/BbAa). Gametes were manually stripped by applying gentle pressure along the abdomen and inseminated using a NaHCO<sub>3</sub> solution (pH 8.0) for sperm activation. After two minutes, eggs were hydrated for 20 minutes and then washed with water. Egg incubation and larvae-juvenile rearing were performed separately in open flow through systems at temperatures ranging from 10 to 13 °C.

### Examination and measurement of chromatophores

Two-year-old fish with wild-type, yellow-albino, cobalt blue, and white-albino phenotypes were euthanized in an overdose of benzocaine solution. After complete removal of scales, skin tissues with about 2 cm x 2 cm from the dorsal region located between the lateral line and dorsal fin were stripped off. Fresh skin samples were mounted in slides and analyzed under a fluorescent microscope (BX53; Olympus, Japan). Images were captured with a CCD Camera (DP73) and analyzed by CellSens software (ver. 1.12; Olympus, Japan). The number of xanthophores from five to seven fields were counted for each color phenotype. The area of those cells (n = 15 cells per color phenotype) was measured using Image J software [22]. This method was based on autofluorescence properties of yellow pteridine pigments of xanthophores under ultraviolet light and has been used for xanthophores visualization in many fish species, such as zebrafish (*Danio rerio*) [23,24].

### Analysis of growth performances in four color phenotypes

Body weight (BW) and standard length (SL) were measured in four color phenotypes (n = 14 to 25) obtained from the cross between blue female (F0) and white male (F1). All measurements were performed in 18 months-old adult females. Males were not included in the analysis due to the presence of precocious males. Condition factor (K) was calculated as  $BW (Kg)/SL (cm)^3$ .

### Morphological and morphometrical comparison of pituitary among four color phenotypes

The pituitary was carefully dissected from juveniles (about 6 months) and adult females and males (about 2 years) from the four color phenotypes (S1 Table). The relative weight was calculated as pituitary weight (g) divided by total body weight (Kg).

### Gene expression analysis in the pituitary by qRT-PCR

The mRNA expression of growth hormone, prolactin, deiodinase 1 and 2, thyroid stimulating hormone, and thyroid-releasing hormone was analysed in the pituitary of female adult trouts

from cobalt blue ( $n = 4$ ; BW =  $880 \pm 28.3$  g; SL =  $35.2 \pm 0.5$  cm; GSI =  $1.42 \pm 0.56$ ) and wild type phenotypes ( $n = 4$ ; BW =  $925 \pm 156.1$  g; SL =  $36.2 \pm 2.4$  cm; GSI =  $1.69 \pm 1.53$ ). Samples were fixed in RNAlater and stored at  $-80^\circ\text{C}$  until processing. Total RNA was extracted from pituitary using 1 ml of TRIZOL Reagent (Invitrogen) following the manufacturer's instructions. RNA samples (1  $\mu\text{g}$ ) were treated with Deoxyribonuclease I Amplification Grade (Invitrogen) and reverse-transcribed using SuperScript III RNase H- (Invitrogen) with oligo(dT)12-18, following the manufacturer's instructions. Primer sequences, amplicon size, and GenBank accession numbers are described in [S2 Table](#). Real Time PCR was performed in 15  $\mu\text{l}$  reaction volumes containing 2x Power SYBR<sup>®</sup> Green PCR Master Mix (ABI), 1  $\mu\text{l}$  of first strand cDNA (approximately 25 ng) and 5 pmol of each primer in a Step One Real Time PCR System (Applied Biosystems, Foster City, USA), using standard program. Transcript abundance was quantified using the Standard Curve Method with four dilution points and normalized against respective  $\beta$ -actin values.

### Statistical analyses

The significance of deviations from 1:1 and 3:1 in the proportion of color phenotypes in the progenies was analyzed by the Chi-square test, with Microsoft Excel 2013 (Microsoft; Redmond, WA). The difference between groups was analyzed by One-way ANOVA followed Bonferroni's test using GraphPad Prism (v.5.00; GraphPad Software, San Diego, CA, USA) or by Student's T test. Differences were considered as significant for  $p < 0.05$ .

## Results

### Color inheritance in crosses among blue, wild-type, and albino trouts

Crosses between blue female vs. wild-type male and wild-type female vs. blue male generated balanced proportions of both cobalt blue and wild-type phenotypes ([Table 1](#)). For three crosses between blue individuals (crosses #4, #5, and #6), the proportion between blue and wild-type was approximately 3:1, as supported by Chi-square test ([Table 1](#)). In the reciprocal crosses between blue and dominant yellow-albino phenotypes, about half of the fish were yellow-albino while another half was white-albino ([Table 1](#); [Fig 1](#)).

The F1 cobalt blue trout generated from crosses #4, #5, and #6 were used for progeny tests. Single-pair crosses between cobalt blue females ( $n = 10$ ) and wild-type males, and between wild-type females and cobalt blue males ( $n = 10$ ) generated eight all-cobalt blue progenies. The remaining 12 crosses yielded mixed-populations of blue and wild-type offspring ([Table 2](#)), whereby in six crosses the proportions did not deviated from 1:1 ( $p \geq 0.05$ ); in the remaining six, the proportion of wild-type were higher than that of cobalt blue in four crosses. From these results we can surmise that those eight individuals are homozygous for the blue color and the other 12 heterozygous for the *locus* responsible for the blue phenotype.

In a cross between F0 cobalt blue and F1 white-albino trouts, white-albino, cobalt blue, yellow-albino, and wild-type trouts were obtained ([Table 3](#)) in a proportion that did not differ significantly from 3:3:1:1, respectively (Chi-square test;  $p < 0.05$ ). In the intercross between F1 white-albino trouts, white-albino, yellow-albino, cobalt blue, and wild-type trouts were obtained ([Table 3](#); [Fig 1](#)) in a proportion that did not differ significantly from 9:3:3:1 (Chi-square test;  $p < 0.05$ ), respectively, as expected from a cross between double heterozygous, based on Mendelian segregation. The F1 yellow trouts were also intercrossed, yielding yellow and wild-type trouts ([Table 3](#); [Fig 1](#)) in a proportion that did not differ significantly from 3:1 (Chi-square test;  $p < 0.05$ ), respectively, as expected from a cross between trouts with both alleles recessive for the blue *locus* (bb) and those for yellow in heterozygous condition (Aa), based on Mendelian segregation.

**Table 1. Frequency of color phenotypes generated by crosses using cobalt blue, wild-type, and yellow-albino (dominant) rainbow trout.**

| Cross (dam, sire) | Progeny phenotype |           |            | $\chi^2$ | Probability |
|-------------------|-------------------|-----------|------------|----------|-------------|
|                   | Cobalt Blue       | Wild-type | Others     |          |             |
| #1 (Bb, bb) **    | 114               | 75        | 0          | 8.04     | 0.004       |
| #2 (bb, Bb)       | 56                | 47        | 0          | 0.78     | 0.375       |
| #3 (bb, Bb) *     | 207               | 168       | 0          | 4.05     | 0.044       |
| #4 (Bb, Bb)       | 157               | 61        | 0          | 1.03     | 0.309       |
| #5 (Bb, Bb)       | 217               | 67        | 0          | 0.30     | 0.583       |
| #6 (Bb, Bb) *     | 118               | 22        | 0          | 6.43     | 0.011       |
| #7 (AA, Bb)       | 0                 | 0         | 321 yellow | 0.19     | 0.661       |
|                   |                   |           | 310 white  |          |             |
| #8 (Bb, AA)       | 0                 | 0         | 28 yellow  | 0.17     | 0.683       |
|                   |                   |           | 25 white   |          |             |
| #9 (Bb, AA)       | 0                 | 0         | 102 yellow | 0.08     | 0.777       |
|                   |                   |           | 98 white   |          |             |

Crosses, frequency of progenies, and statistical analysis by chi-square considering a proportion of 1:1 for crosses #1, #2, #3, #7, #8, and #9; for crosses #4, #5, and #6 between Bb, a proportion of 3:1 was considered. Bb: F0 Cobalt blue; AA: Yellow-albino; bb: Wild-type.

\*:  $p < 0.05$

\*\* :  $p < 0.01$

<https://doi.org/10.1371/journal.pone.0214034.t001>

### Analysis of chromatophores in the four color phenotypes

The analysis of melanophores demonstrated that these cells were present in wild-type and cobalt blue (although slightly contracted) whereas in yellow- and white-albino rainbow trouts they were absent (Fig 2A; bright field images of chromatophores indicated by blue arrowhead). In case of xanthophores (Fig 2A; fluorescence images indicated by red arrowhead), they were present in all phenotypes, including the white one. A comparison in the number of xanthophores (Fig 2B) revealed that they were most abundant in the wild-type, followed by dominant yellow-albino, cobalt blue, and white-albino phenotypes; between the last two groups there was no significant difference. The measurement of relative area of xanthophores in dominant yellow-albino trout were almost three times larger compared to other three color phenotypes (Fig 2C), that did not differ among themselves.

### Analysis of growth in four color phenotypes

The standard length was higher in the wild-type followed by the yellow-albino, cobalt blue, and white-albino phenotypes (Fig 3A). A similar pattern was observed for body weight, whereby wild-type presented higher values in relation to yellow-albino, followed by cobalt blue and white-albino (Fig 3B). For standard length, white-albino group showed significantly lower values than the wild-type, but not with cobalt blue and yellow-albino (Fig 3A). For body weight, white-albino and cobalt blue showed significantly lower values than the wild-type ( $p < 0.05$ ) (Fig 3B).

### Analysis of pituitary in four color phenotypes

The comparison of pituitary morphology showed that juveniles and adults of cobalt blue and white-albino presented a smaller pituitary compared to wild-type and yellow-albino rainbow trout (Fig 3G). The values of relative pituitary weight of cobalt blue and white-albino phenotypes were significantly lower than those of wild-type and yellow-albino for both juveniles and

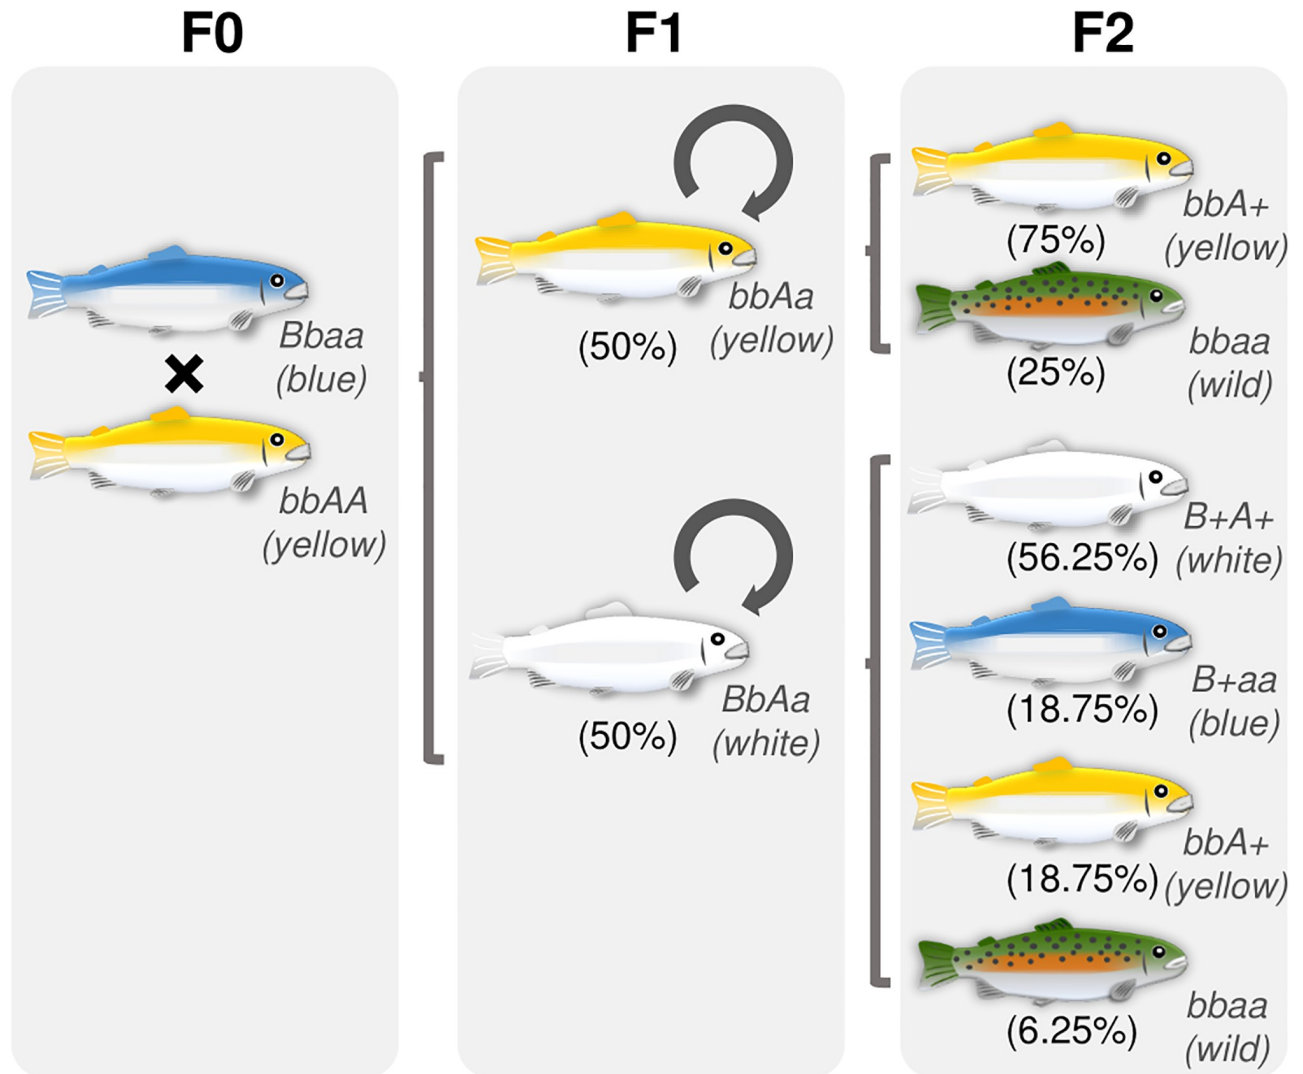

**Fig 1. Schematic representation of crosses illustrating the pattern of color inheritance.** Cobalt blue and yellow-albino (F0) were initially crossed. Then, F1 yellow- and white-albino trouts were crossed with the same color phenotype, as indicated by loops. The first group produced an F2 generation composed of yellow-albino and wild-type trouts in a proportion of 3:1, following Mendelian segregation for crosses between  $bbAa$  genotypes. Crosses between F1 white-albino produced an F2 generation composed of white-albino, cobalt blue, yellow-albino, and wild-type phenotypes in a 9:3:3:1 proportion, following Mendelian segregation for crosses between double heterozygous  $BbAa$ .

<https://doi.org/10.1371/journal.pone.0214034.g001>

adults (Fig 3D–3F) ( $p < 0.05$ ). No significant differences were found between wild-type and yellow-albino as well as between cobalt blue and white-albino phenotypes.

### Gene expression analysis in the pituitary of cobalt blue and wild type phenotypes

The mRNA expression of growth hormone (*gh*), prolactin (*prl*), deiodinase 1 (*deio1*) and 2 (*deio2*) genes did not present any difference between cobalt blue and wild-type phenotypes (Fig 4A). However, the cobalt blue group presented higher expression of thyroid stimulating hormone (*tshb*) and thyroid-releasing hormone (*trh*) compared to the wild-type (Fig 4A); these two genes showed a high correlation ( $R^2$ ) in both phenotypes (Fig 4B) of 0.89 and 0.85, respectively.

**Table 2. Results of progeny tests to determine the genotype of blue trouts.**

| ID of parental cobalt blue | Progeny phenotype |           | $\chi^2$ | Probability |
|----------------------------|-------------------|-----------|----------|-------------|
|                            | Cobalt Blue       | Wild-type |          |             |
| H1                         | 159               | 149       | 0.32     | 0.568       |
| H2**                       | 137               | 243       | 29.56    | 0.000       |
| H3*                        | 186               | 149       | 4.08     | 0.043       |
| H4                         | 296               | 0         | 296      | 0.000       |
| H5                         | 161               | 175       | 0.58     | 0.455       |
| H6                         | 290               | 0         | 290      | 0.000       |
| H7                         | 229               | 0         | 229      | 0.000       |
| H8**                       | 93                | 172       | 23.55    | 0.000       |
| H9                         | 29                | 0         | 29       | 0.000       |
| H10**                      | 70                | 106       | 7.36     | 0.006       |
| M1                         | 398               | 0         | 398      | 0.000       |
| M2                         | 18                | 0         | 18       | 0.000       |
| M3                         | 159               | 188       | 2.42     | 0.119       |
| M4                         | 108               | 111       | 0.04     | 0.839       |
| M5                         | 42                | 39        | 0.11     | 0.738       |
| M6                         | 45                | 48        | 0.09     | 0.755       |
| M7*                        | 67                | 95        | 4.83     | 0.027       |
| M8                         | 67                | 0         | 67       | 0.000       |
| M9*                        | 48                | 26        | 6.54     | 0.010       |
| M10                        | 104               | 0         | 104      | 0.000       |

Progeny tests using wild-type and F1 cobalt blue rainbow trouts derived from crosses between blue individuals (crosses #4, #5, and #6 of Table 1) and statistical analysis by Chi-square test considering a proportion of 1:1. H: female; M: male;

\*:  $p < 0.05$ ;

\*\* :  $p < 0.01$ .

<https://doi.org/10.1371/journal.pone.0214034.t002>

## Discussion

Color variations from wild-type have been described for many teleosts, especially in farmed species subjected to intensive inbreeding [25]. In rainbow trout, color phenotypes including the yellow-albino and cobalt/metallic blue have been reported, but most of them display recessive inheritance and impairments related to growth or reproduction aspects [12,14]. In this

**Table 3. Frequency of color phenotypes in crosses with blue, yellow-abino, and white-albino trouts.**

| Cross | dam sire         | Progeny phenotype |             |               |           | $\chi^2$ | Probability |
|-------|------------------|-------------------|-------------|---------------|-----------|----------|-------------|
|       |                  | White-albino      | Cobalt Blue | Yellow-albino | Wild-type |          |             |
| #10   | F0 Cobalt Blue   | 157               | 165         | 75            | 64        | 7.760    | 0.051       |
|       | F1 White-albino  |                   |             |               |           |          |             |
| #11   | F1 Yellow-albino | 0                 | 0           | 185           | 60        | 0.034    | 0.853       |
|       | F1 Yellow-albino |                   |             |               |           |          |             |
| #12   | F1 White-albino  | 379               | 126         | 132           | 44        | 1.075    | 0.783       |
|       | F1 White-albino  |                   |             |               |           |          |             |

Frequency of four color phenotypes produced by a cross between F0 blue female and F1 white-albino male, and by intercrosses between F1 yellow-albino and F1 white-albino rainbow trout.

Chi-square test considering proportions of 3:3:1:1 (#10), 0:0:3:1 (#11), and 9:3:3:1 (#12) of white, blue, yellow, and wild-type respectively.

<https://doi.org/10.1371/journal.pone.0214034.t003>

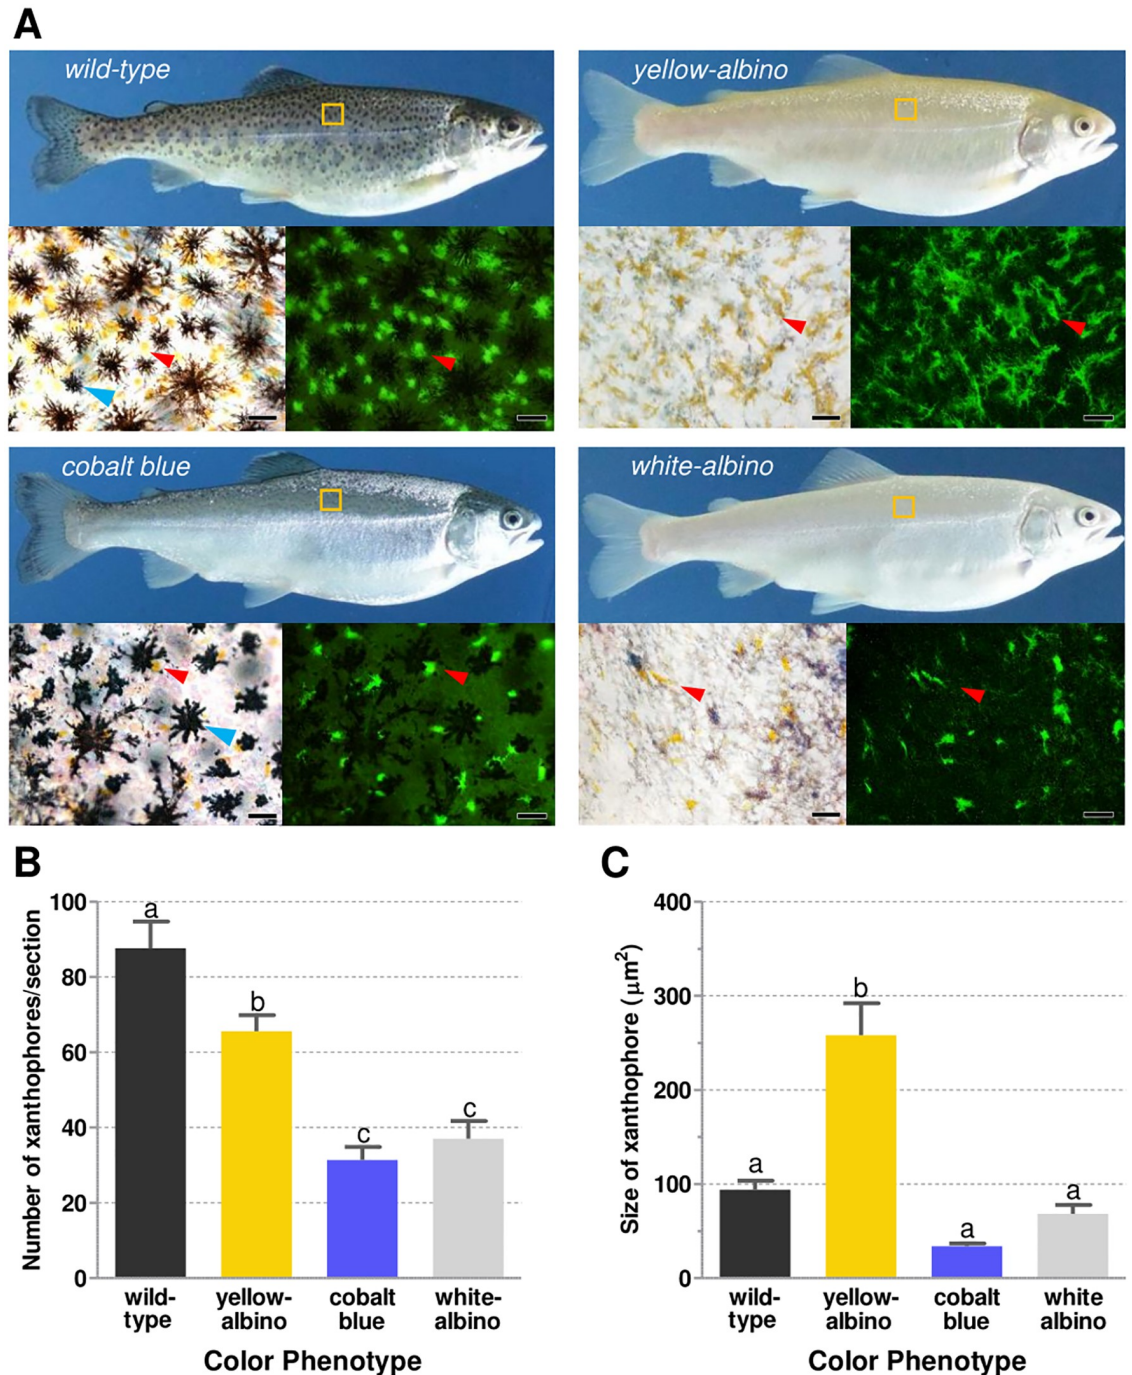

**Fig 2. External appearance and chromatophores analysis in the four color phenotypes.** A: Lateral view of wild-type, cobalt blue, yellow-albino, and white-albino female adults of rainbow trout. Chromatophores in bright field (left inferior) and under fluorescence (right inferior; xanthophores emit green auto fluorescence); the region selected for chromatophore analysis is depicted by a yellow box. Cobalt blue melanophores are more contracted compared to wild-type. Yellow- and white-albino are devoid of melanophores, which are indicated by blue arrowheads; red arrowhead indicates xanthophores. Scale bars indicate 25 µm. B: Number of xanthophores per section and C: size of xanthophores in the dorsal region of trouts from each color phenotype (same as Fig 2A). Different letters represent significant difference for  $p < 0.05$  by one-way ANOVA analysis. Data are shown as average  $\pm$  SEM. Five to seven fields were randomly selected and analyzed for each color phenotype.

<https://doi.org/10.1371/journal.pone.0214034.g002>



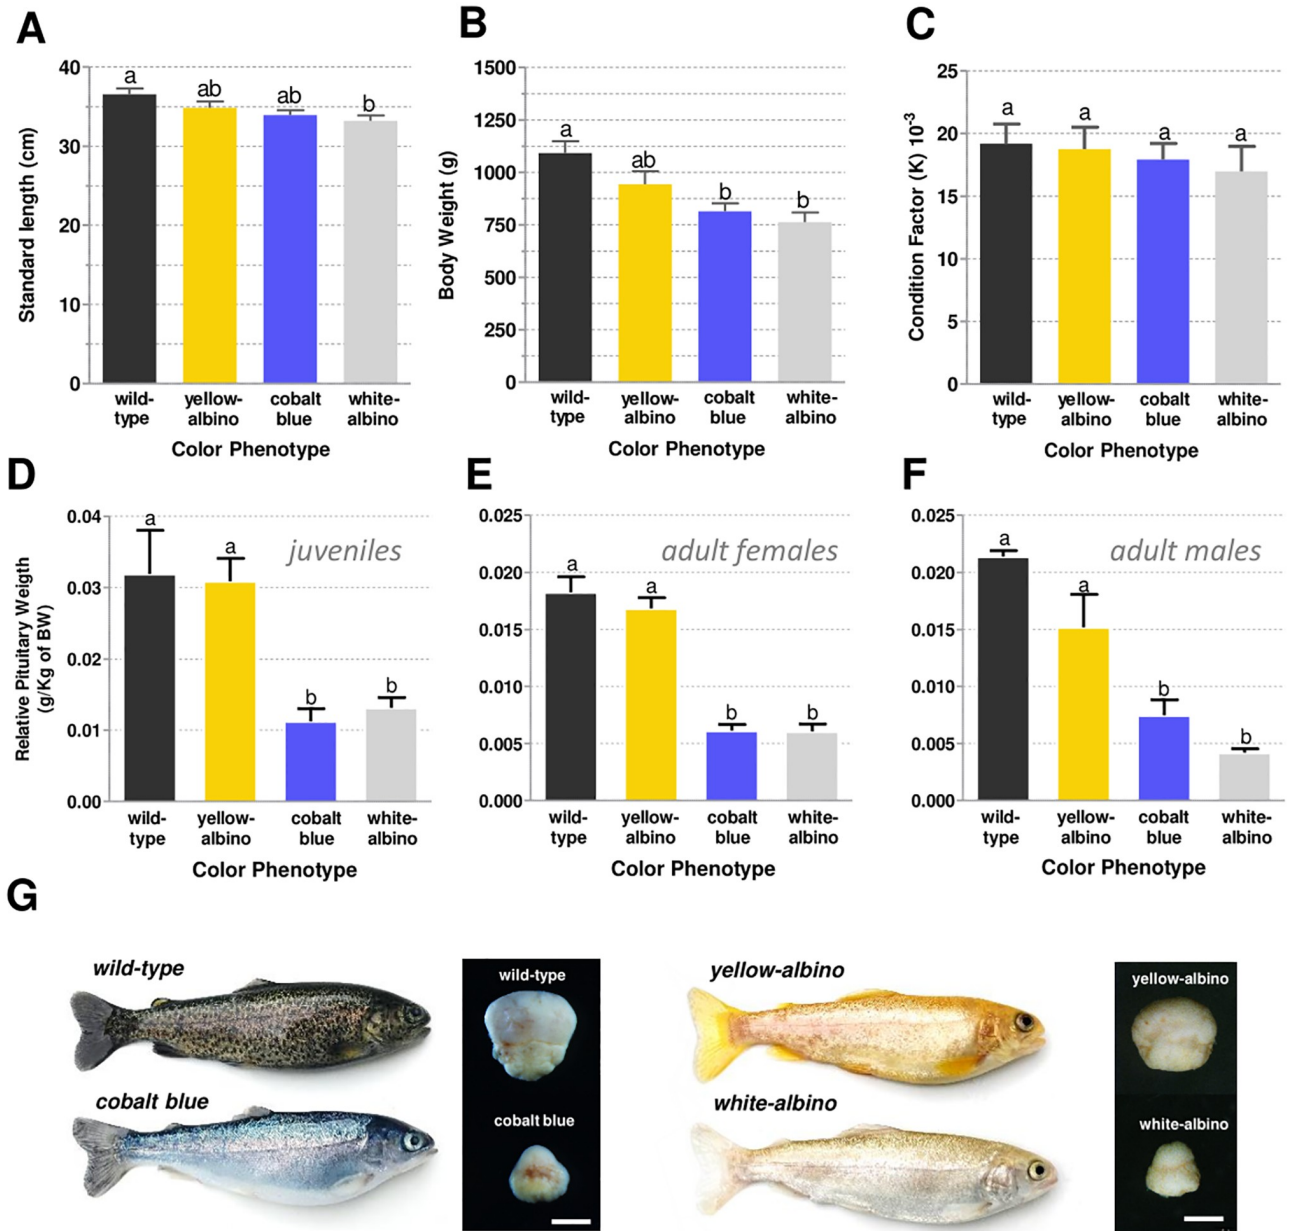

**Fig 3. Comparative analysis of growth and pituitary morphology among color phenotypes.** A: Standard length, B: body weight, and C: condition factor analysis in females from the four color phenotypes (n = 14 per color phenotype). D-F: Relative pituitary weight in juveniles, adult females, and adult males from the four color phenotypes. G: Images of pituitary in wild-type, cobalt blue, yellow-albino, and white-albino juveniles with similar sizes and same age. Different letters represent significant difference by one-way ANOVA analysis for  $p < 0.05$ . Data are shown as average  $\pm$  SEM. Scale bar represents 0.5 mm.

<https://doi.org/10.1371/journal.pone.0214034.g003>

study, we investigated the color inheritance and analyzed the density and types of chromatophores with focus in rainbow trout expressing a cobalt blue phenotype from juvenile to adult stages. Our results support that the allele responsible for the cobalt blue phenotype shows dominance over the wild-type and co-dominance in relation to yellow-albino; in the latter case a new, white-albino phenotype was generated. The analysis of chromatophores in cobalt blue revealed the presence of contracted melanophores and a reduced number of xanthophores,

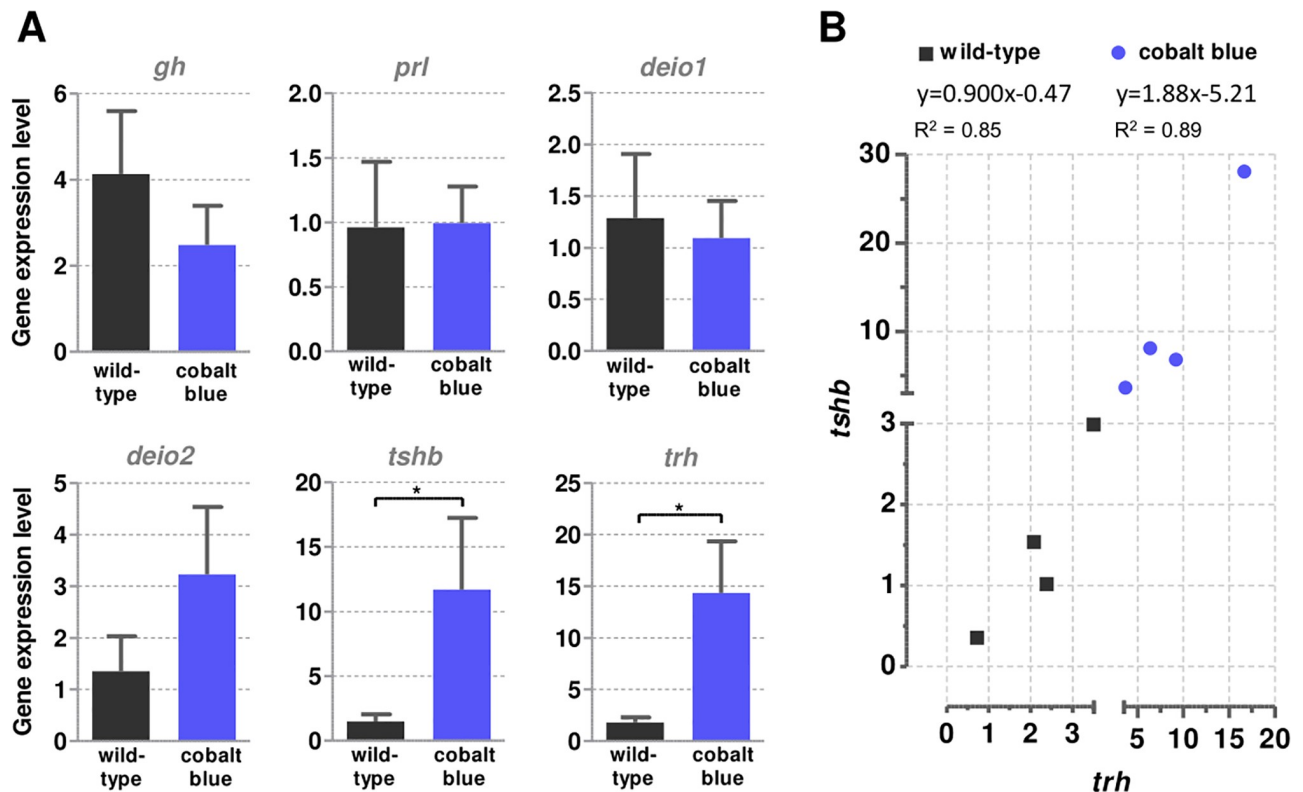

**Fig 4. Relative expression of genes in the pituitary of cobalt blue and wild type phenotypes.** A: Grow hormone (*gh*), prolactin (*prl*), deiodinase 1 (*deio1*), deiodinase 2 (*deio2*), thyroid stimulating hormone (*tshb*), and thyroid-releasing hormone (*trh*). Expression of target genes was normalized against the respective  $\beta$ -actin values. Genes with significant difference by Student's T test are indicated by an asterisk ( $p < 0.05$ ). Data are shown as average  $\pm$  SEM. B: Linear correlation analysis between the relative expression of *tshb* and *trh* in wild-type and cobalt blue phenotypes (same data from A), with linear correlation coefficient ( $R^2$ ) values for each group.

<https://doi.org/10.1371/journal.pone.0214034.g004>

whereas white-albino trouts were devoid of melanophores and, as the blue phenotype, presented lower density of xanthophores.

The blue phenotype represents an attractive phenotype due to external appearance with silvery colors [26], but the recessive inheritance was the main constraint for the establishment of commercial strains due to deficiencies in growth or reproduction [12,21,27]. The dominance of cobalt blue over the wild-type demonstrated by single-pair crosses represents an interesting characteristic, since the blue phenotype can be maintained even in a heterozygous condition, which thus allows the commercial production of hybrid blue strains by getting benefit from interstrain heterosis [28]. Our cobalt blue trout showed survival rates and fertility of both females and males comparable to the wild-type, but a slightly lower growth performances, which could be related to particular morphology of blue trouts (see Discussion later). Nevertheless, the use of such a dominant strain, in association with wild-type strains displaying improved traits, may contribute to the development of new blue strains with high growth rates, tolerance to specific environmental conditions or resistance to pathogens [29–31].

The mechanisms involved in the blue coloration, especially in relation to chromatophores, in these trouts have not been clearly described. Although a previous study [15] proposed that it is caused by the Tyndall effect, through a structural arrangement of melanin, the blue color in the majority of fish species is known to be caused by light scattering in platelets within iridophores [32,33]. The expression of blue color is enhanced when light is scattered by iridophore

crystals (purines and pteridines) underlain by a dark surface, which could be the melanin of melanophores. When combined to yellow color from xanthophores, a green color is generated [5] whereas in its absence/reduction a blueish color is expressed [13]. The combined analysis of chromatophores and the results of crosses, especially between cobalt blue and yellow-albino trouts, are in agreement with this process, whereby a lower density of xanthophores was detected not only in the dorsal region, but also on the belly and undersides. Thus, besides the lower density of xanthophores, cobalt blue rainbow trout is supposed to require both iridophores and melanophores (probably in a contracted state) for the expression of blue color. On the other hand, the absence of melanophores and a lower density of xanthophores has probably yielded the white-albino phenotype, due to the reflectance of all colors by iridophores. The fact that blue and white-albino trouts do not acquire the characteristic reddish color in the lateral region and fins upon salmonization (Hattori, unpublished data), which is common in wild-type and yellow-albino, can be explained by low density of xanthophores, since carotenoids as astaxanthin are deposited in those chromatophores [34].

Melanophores, iridophores, and xanthophores are derived from neural crest cells, but the first two differentiate from a common pigment cell progenitor, whose fate is regulated by an interplay between *foxd3* and *mitfa* [35]. Xanthophores differentiate directly from neural crest cells or from an unknown precursor cell, presenting its own specification and differentiation pathway [36]. There are several genes involved in the differentiation and pigmentation of xanthophores described for fish, such as *pax7a*, *slc2a15b*, and *slc2a11b* [36], that could be implicated in the expression of blue color in our cobalt blue strain, but it seems that this color phenotype is caused by a mutation in a gene related to neuroendocrine pathway that somehow affect chromatophores rather than in a gene directly involved in chromatophore specification. This assumption was based on differences found in body morphology and also in the size of pituitary, which was inferior not only in cobalt blue but also in white-albino trouts that also carry the allele responsible for blue phenotype.

Although a more detailed analysis is still required, particularly in terms of ontogeny, structure, and hormone secretion of pituitary, an intriguing aspect of cobalt blue trouts lies in their resemblance to the sea run form. This stage is characterized by a blueish color on dorsal region, silvery/whitish color on the belly and undersides, and an elongated body shape, which arises through the smoltification process during transition from freshwater to marine environment [37]. This process, characterized by physiological modifications, involves changes in body morphology and color patterning, which are triggered by environmental cues and mediated through a complex hormonal *milieu*, including the growth hormone/insulin-like growth factor 1, cortisol, thyroid hormones and also prolactin [38–40]. Based on the presence of many common traits between sea run form and the cobalt blue trouts, including a reduced number of xanthophores [41] and contracted melanophores [42,43], it is possible that this phenotype could be caused by a mutation in a gene involved in the onset of smoltification process. Interestingly, our gene expression analysis in the pituitary supported the involvement of both thyroid-stimulating and thyroid-releasing hormones, wherein both *tshb* and *trh* were upregulated in cobalt blue compared to wild-type, thus suggesting higher levels of thyroid hormones in blue trouts. These results are in line with previous studies in salmonids which were able to induce silvering-smolt stage in Atlantic salmon, brown trout, and also in rainbow trout through injection of thyroid extracts or thyrotropic hormone [41–43]. The analysis of genes upstream *trh* in other parts of brain (e.g. hypothalamus) and a general profiling of neuroendocrine hormones is being currently considered.

Compared to yellow-albino trouts, the white-albino is a rarer phenotype with few descriptions in fish species [36]. These two phenotypes can be obtained by mutations affecting melanophores or melanin synthesis [10,44,45]. Our crosses demonstrated that in rainbow trout, the

white phenotype requires the presence of at least one dominant allele for each of blue and yellow-albino *loci* to be expressed. The analysis of chromatophores revealed that white-albino trouts were devoid of melanophores, as the yellow-albino phenotype, and presented a reduced number of xanthophores. In medaka, another population of chromatophores called leucophores responsible for the white color have been described, however these cells are absent in zebrafish and rainbow trout [36,46,47]. Thus, those information are suggestive that the white-albino phenotype could be simply explained by the concomitant absence of melanophores and xanthophores and the presence of iridophores that reflect all light wavelengths, resulting in a white-albino phenotype.

In conclusion, this study shows that the cobalt blue rainbow trout presents dominant inheritance in relation to wild-type and co-dominance with dominant yellow-albino trouts; in this last case a fourth phenotype called white-albino was generated. The allele responsible for the reduced number of xanthophores is supposedly a mutation in a gene related to the regulation of HPT (hypothalamus-pituitary-thyroid), possibly upstream *tshb* and *trh* genes. Comparative studies among color variations in trout can be useful for endocrinology studies related to pigmentation process, particularly to ontogeny and specification of chromatophores, to growth performance, and also to pituitary development.

## Supporting information

**S1 Table. Morphometrical data of samples used in the analysis of pituitary.** Standard length (cm; upper) and total body weight (Kg; bottom) of juveniles and adult fish used for pituitary comparison analysis. Data are represented by the average  $\pm$  SD. Numbers between brackets represent the sample size per color phenotype.

(DOCX)

**S2 Table. Oligonucleotide information used in qRT-PCR analysis.** Gene names, primers sequence, amplicon size in base pairs and GenBank accession numbers of sequences used for primers design.

(DOCX)

## Acknowledgments

The authors thank L.R.S., A.D.S., and R.A.S.L. for fish rearing and maintenance.

## Author Contributions

**Conceptualization:** Ricardo Shohei Hattori, Shoko Hattori-Ihara, Ricardo Yasuichi Tsukamoto, Neuza Sumico Takahashi, Yara Aiko Tabata.

**Formal analysis:** Ricardo Shohei Hattori, Arno Juliano Butzge, Ricardo Yasuichi Tsukamoto, Yara Aiko Tabata.

**Funding acquisition:** Ricardo Shohei Hattori.

**Investigation:** Shoko Hattori-Ihara, Ricardo Yasuichi Tsukamoto, Neuza Sumico Takahashi.

**Methodology:** Ricardo Shohei Hattori, Tulio Teruo Yoshinaga, Arno Juliano Butzge, Yara Aiko Tabata.

**Project administration:** Ricardo Shohei Hattori.

**Supervision:** Yara Aiko Tabata.

**Writing – original draft:** Ricardo Shohei Hattori.

**Writing – review & editing:** Ricardo Shohei Hattori, Tulio Teruo Yoshinaga, Ricardo Yasui-chi Tsukamoto, Neuza Sumico Takahashi, Yara Aiko Tabata.

## References

1. Hofreiter M, Schöneberg T. The genetic and evolutionary basis of colour variation in vertebrates. *Cell Mol Life Sci.* 2010; 67: 2591–2603. <https://doi.org/10.1007/s00018-010-0333-7> PMID: 20229234
2. Sköld HN, Aspengren S, Cheney KL, Wallin M. Fish Chromatophores—From Molecular Motors to Animal Behavior. *Int Rev Cell Mol Biol.* 2016; 321: 171–219. <https://doi.org/10.1016/bs.ircmb.2015.09.005> PMID: 26811288
3. Price AC, Weadick CJ, Shim J, Rodd FH. Pigments, Patterns, and Fish Behavior. *Zebrafish.* 2008; 5: 297–307. <https://doi.org/10.1089/zeb.2008.0551> PMID: 19133828
4. Hilsdorf AWS, Penman DJ, Farias EC, McAndrew B. Melanophore appearance in wild and red tilapia embryos. *Pigment Cell Res.* 2002; 15: 57–61. <https://doi.org/10.1034/j.1600-0749.2002.00058.x> PMID: 11837457
5. Bagnara JT, Fernandez PJ, Fujii R. On the blue coloration of vertebrates. *Pigment cell Res.* 2007; 20: 14–26. <https://doi.org/10.1111/j.1600-0749.2006.00360.x> PMID: 17250544
6. Blanc JM, Poisson H. Expression of family differences through within-lot competition in juvenile rainbow trout *Oncorhynchus mykiss*. *J World Aquac Soc.* 2003; 34: 425–432.
7. Chourrout D. Thermal induction of diploid gynogenesis and triploidy in the eggs of the rainbow trout (*Salmo gairdneri* Richardson). *Reprod Nutr Dev.* 1980; 20: 272–733. <https://doi.org/10.1051/rnd:19800415>
8. Thorgaard GH, Spruell P, Wheeler PA, Scheerer PD, Peek AS, Valentine JJ, et al. Incidence of albinos as a monitor for induced triploidy in rainbow trout. *Aquaculture.* 1995; 137: 121–130. [https://doi.org/10.1016/0044-8486\(95\)01116-1](https://doi.org/10.1016/0044-8486(95)01116-1)
9. Boonanuntanasarn S, Yoshizaki G, Iwai K, Takeuchi T. Molecular cloning, gene expression in albino mutants and gene knockdown studies of tyrosinase mRNA in rainbow trout. *Pigment cell Res.* 2004; 17: 413–21. <https://doi.org/10.1111/j.1600-0749.2004.00166.x> PMID: 15250944
10. Edvardsen RB, Leininger S, Kleppe L, Skafnesmo KO, Wargelius A. Targeted mutagenesis in atlantic salmon (*Salmo salar* L.) using the CRISPR/Cas9 system induces complete knockout individuals in the F0 Generation. *PLoS One.* 2014; 9. <https://doi.org/10.1371/journal.pone.0108622> PMID: 25254960
11. Dobosz S, Kohlmann K, Goryczko K, Kuzminski H. Growth and vitality in yellow forms of rainbow trout. *J Appl Ichthyol.* 2000; 16: 117–120. <https://doi.org/10.1046/j.1439-0426.2000.00147.x>
12. Kincaid HL. Iridescent metallic blue color variant in rainbow trout. *J Hered.* 1975; 66: 100–102. <http://dx.doi.org/10.1093/oxfordjournals.jhered.a108578>
13. Farias EC, Rigolino MG, Tabata YA, Corrêa da Silva Neto B. Polimorfismo em Truta arco-íris—I. Padrões cromáticos em polimorfos de Truta arco-íris (*Salmo irideus*, GIBBONS) (Osteichthyes, Salmoniformes, Salmonidae). *Bol do Inst Pesca.* 1986; 13: 115–119.
14. Nakamura K, Ozaki A, Akutsu T, Iwai K, Sakamoto T, Yoshizaki G, et al. Genetic mapping of the dominant albino locus in rainbow trout (*Oncorhynchus mykiss*). *Mol Genet Genomics.* 2001; 265: 687–693. Available: <http://www.ncbi.nlm.nih.gov/pubmed/1459189>
15. Blanc JM, Poisson H, Quillet E. A Blue Variant in the Rainbow Trout, *Oncorhynchus mykiss* Walbaum. *J Hered.* 2006; 97: 89–93. <https://doi.org/10.1093/jhered/esj010> PMID: 16407526
16. Blanc JM. Effects of Egg Size Differences on Juvenile Weight between and within Lots in Rainbow Trout *Oncorhynchus mykiss*. *J World Aquac Soc.* 2002; 33: 278–286. <https://doi.org/10.1111/j.1749-7345.2002.tb00504.x>
17. Yada T, Moriyama S, Suzuki Y, Azuma T, Takahashi A, Hirose S, et al. Relationships between obesity and metabolic hormones in the “cobalt” variant of rainbow trout. *Gen Comp Endocrinol.* 2002; 128: 36–43. Available: <http://www.ncbi.nlm.nih.gov/pubmed/12270786>
18. Oguri M. On the Enlarged Liver in “Cobalt” Variant of Rainbow Trout. *Nippon Suisan Gakkaishi.* 1976; 42: 823–830. <https://doi.org/10.2331/suisan.42.823>
19. Oguri M. Renal Hypertrophy in “Cobalt” Variant of Rainbow Trout. *Nippon Suisan Gakkaishi.* 1992; 58: 803–803. <https://doi.org/10.2331/suisan.58.803>
20. Oguri M. Thickening of Renal Tubules in the Kidney of the “Cobalt” Rainbow Trout. *Nippon Suisan GAKKAISHI.* 1993; 59: 569. <https://doi.org/10.2331/suisan.59.569>
21. Kaneko T, Kakizawa S, Yada T. Pituitary of “Cobalt” Variant of the Rainbow Trout Separated from the Hypothalamus Lacks Most Pars Intermedia and Neurohypophysial Tissue. *Gen Comp Endocrinol.* 1993; 92: 31–40. <https://doi.org/10.1006/gcen.1993.1140>

22. Schneider CA, Rasband WS, Eliceiri KW. NIH Image to ImageJ: 25 years of image analysis. *Nat Methods*. 2012; 9: 671–675. <https://doi.org/10.1038/nmeth.2089> PMID: 22930834
23. Odenthal J, Rossnagel K, Haffter P, Kelsh RN, Vogelsang E, Brand M, et al. Mutations affecting xanthophore pigmentation in the zebrafish, *Danio rerio*. *Development*. 1996; 123: 391–398. Available: <http://www.ncbi.nlm.nih.gov/pubmed/9007257> PMID: 9007257
24. Le Guyader S, Jesuthasan S. Analysis of xanthophore and pterinosome biogenesis in zebrafish using methylene blue and pteridine autofluorescence. *Pigment Cell Res*. 2002; 15: 27–31. Available: <http://www.ncbi.nlm.nih.gov/pubmed/11837453>
25. Kristensen TN, Sørensen AC. Inbreeding—lessons from animal breeding, evolutionary biology and conservation genetics. *Anim Sci*. 2007/03/09. 2005; 80: 121–133. <https://doi.org/10.1079/ASC41960121>
26. Colihueque N. Genetics of salmonid skin pigmentation: Clues and prospects for improving the external appearance of farmed salmonids. *Rev Fish Biol Fish*. 2010; 20: 71–86. <https://doi.org/10.1007/s11160-009-9121-6>
27. Yamazaki F. On the so-called “Cobalt” Variant of Rainbow Trout. *Nippon Suisan Gakkaishi*. 1974; 40: 17–25. <https://doi.org/10.2331/suisan.40.17>
28. Granier S, Audet C, Bernatchez L. Heterosis and outbreeding depression between strains of young-of-the-year brook trout (*Salvelinus fontinalis*). *Can J Zool*. 2011; 89: 190–198. <https://doi.org/10.1139/Z10-108>
29. Crouse CC, Davidson JW, Good CM, May TC, Summerfelt ST, Kenney PB, et al. Growth and fillet quality attributes of five genetic strains of rainbow trout (*Oncorhynchus mykiss*) reared in a partial water reuse system and harvested at different sizes. *Aquac Res*. 2018; 49: 1672–1681. <https://doi.org/10.1111/are.13623>
30. Ineno T, Tamaki K, Yamada K, Kodama R, Tsuchida S, Tan E, et al. Thermal tolerance of a thermally selected strain of rainbow trout *Oncorhynchus mykiss* and the pedigrees of its F1 and F2 generations indicated by their critical thermal maxima. *Fish Sci*. 2018; 84: 671–679. <https://doi.org/10.1007/s12562-018-1217-2>
31. Wagner EJ, Wilson C, Arndt R, Goddard P, Miller M, Hodgson A, et al. Evaluation of Disease Resistance of the Fish Lake—DeSmet, Wounded Man, and Harrison Lake Strains of Rainbow Trout Exposed to *Myxobolus cerebralis* AU—Wagner, Eric J. *J Aquat Anim Health*. 2006; 18: 128–135. <https://doi.org/10.1577/H05-039.1>
32. Goda M, Fujii R. The Blue Coloration of the Common Surgeonfish, *Paracanthurus hepatus*-II. Color Revelation and Color Changes. *Zoolog Sci*. 1998; 15: 323–333. <https://doi.org/10.2108/zsj.15.323> PMID: 18465994
33. Goda M, Fujii R. Coloration and Chromatophores of the Domino Damsel, *Dascyllus trimaculatus*. *Zoolog Sci*. 2001; 18: 165–174. <https://doi.org/10.2108/zsj.18.165>
34. Storebakken T, No HK. Pigmentation of rainbow trout. *Aquaculture*. 1992; 100: 209–229. [https://doi.org/10.1016/0044-8486\(92\)90372-R](https://doi.org/10.1016/0044-8486(92)90372-R)
35. Curran K, Lister JA, Kunke GR, Prendergast A, Parichy DM, Raible DW. Interplay between Foxd3 and Mitf regulates cell fate plasticity in the zebrafish neural crest. *Dev Biol*. 2010; 344: 107–118. <https://doi.org/10.1016/j.ydbio.2010.04.023> PMID: 20460180
36. Kimura T, Nagao Y, Hashimoto H, Yamamoto-Shiraishi Y-i., Yamamoto S, Yabe T, et al. Leucophores are similar to xanthophores in their specification and differentiation processes in medaka. *Proc Natl Acad Sci*. 2014; 111: 7343–7348. <https://doi.org/10.1073/pnas.1311254111> PMID: 24803434
37. Folmar LC, Dickhoff WW. The parr-Smolt transformation (smoltification) and seawater adaptation in salmonids: A review of selected literature. *Aquaculture*. 1980; 21: 1–37. [https://doi.org/10.1016/0044-8486\(80\)90123-4](https://doi.org/10.1016/0044-8486(80)90123-4)
38. Björnsson BT, Stefansson SO, McCormick SD. Environmental endocrinology of salmon smoltification. *Gen Comp Endocrinol*. 2011; 170: 290–298. <https://doi.org/10.1016/j.ygcen.2010.07.003> PMID: 20627104
39. Nichols KM, Edo AF, Wheeler PA, Thorgaard GH. The genetic basis of smoltification-related traits in *Oncorhynchus mykiss*. *Genetics*. 2008; 179: 1559–1575. <https://doi.org/10.1534/genetics.107.084251> PMID: 18562654
40. Raible DW, Eisen JS. Restriction of neural crest cell fate in the trunk of the embryonic zebrafish. *Development*. 1994; 120: 495–503. PMID: 8162850
41. Robertson OH. Production of the silvery smolt stage in rainbow trout by intramuscular injection of mammalian thyroid extract and thyrotropic hormone. *J Exp Zool*. 1949; 110: 337–355. <https://doi.org/10.1002/jez.1401100303> PMID: 18128300
42. Landgrebe BYFW. The Role of the Pituitary and the Thyroid in the Development of Teleosts. *J Exp Biol*. 1941; 18: 162–169.

43. Robertson OH. A study of the melanophore-concentrating effect of mammalian thyroid extract in rainbow trout. *Endocrinology*. 1951; 48: 658–668. <https://doi.org/10.1210/endo-48-6-658> PMID: 14849565
44. Kelsh RN. Genetics and evolution of pigment patterns in fish. *Pigment Cell Res*. 2004; 17: 326–336. <https://doi.org/10.1111/j.1600-0749.2004.00174.x> PMID: 15250934
45. Krauss J, Geiger-Rudolph S, Koch I, Nüsslein-Volhard C, Irion U. A dominant mutation in *tyrp1A* leads to melanophore death in zebrafish. *Pigment Cell Melanoma Res*. 2014; 27: 827–830. <https://doi.org/10.1111/pcmr.12272> PMID: 24891189
46. Kaleta K. Morphological analysis of chromatophores in the skin of trout. *Bull Vet Inst Pulawy*. 2009; 53: 117–121.
47. Parichy DM. Evolution of danio pigment pattern development. *Heredity (Edinb)*. 2006; 97: 200–210. <https://doi.org/10.1038/sj.hdy.6800867> PMID: 16835593
